# Supplementary material
Source: publisher figshare collection journal article supplement (https://karger.figshare.com/ndownloader/files/27061937)
Supplement: Supplementary file 1 [file 27061937]

Supplementary Table 1 Sensitive analysis of recurrence rate

| Study omitted | HR (95%CI) |
| --- | --- |
| Ausania et al 2019 | 0.13 [0.09, 0.16] |
| Dong et al 2019 | 0.14 [0.10, 0.17] |
| Genç et al 2018 | 0.12 [0.09, 0.15] |
| Harimoto et al 2019 | 0.13 [0.09, 0.16] |
| Lopez-Aguiar 2019 | 0.13 [0.09, 0.17] |
| Mao et al 2020 | 0.13 [0.10, 0.17] |
| Partelli et al 2013 | 0.13 [0.09, 0.16] |
| Pulvirenti et al 2019 | 0.13 [0.09, 0.17] |
| Xu et al 2019 | 0.11 [0.09, 0.13] |
| Zou et al 2020 | 0.13 [0.10, 0.17] |
| Combined | 0.13 [0.09, 0.16] |
